# Supplementary material for: Comparative proteogenomic analysis of right-sided colon cancer, left-sided colon cancer and rectal cancer reveals distinct mutational profiles
Source: Mol Cancer. 2018 Dec 21;17:177. doi: 10.1186/s12943-018-0923-9 (PMC6303985; doi:10.1186/s12943-018-0923-9)
Supplement: Supplementary file 4 — Tables S1-S3. PicNiC statistics (bic and aic) for RCC, LCC and rectal cancers. (XLSX 43 kb) [file 12943_2018_923_MOESM4_ESM.xlsx]

## Sheet:  Table S1a
Table S1a: Right colon cancer (RCC) PicNiC statistics (bic)
	SELECTS	SELECTED	OBS.SELECTS	OBS.SELECTED	TEMPORAL.PRIORITY	PROBABILITY.RAISING	HYPERGEOMETRIC	NONPAR.BOOT	STAT.BOOT	MEAN.PREDERR	SD.PREDERR	MEAN.POSTERR	SD.POSTERR
8	Amplification BRCA2	Amplification RB1	6	4	3.99936e-25	7.40083e-93	1.13354e-06	100	100	0.0177778	0.0051793	0.0192593	0.00796272
31	Amplification ERBB2	Mutation ERBB2	5	3	1.52636e-32	5.9202e-94	0	96	100	0.0266667	0.00796272	0.0259259	0.00719871
30	Mutation TP53	Mutation CTNNB1	84	7	2.70298e-96	1.70627e-109	0	93	100	0.0518519	0	0.0518519	0
3	Amplification AURKA	Amplification BRCA2	11	6	1.35764e-64	4.33075e-85	0.000342703	92	100	0.0444444	0	0.0444444	0
7	Pattern OR_PTEN	Amplification MYC	12	7	1.57562e-56	1.61923e-83	0.00112585	90	100	0.0518519	0	0.0518519	0
50	Mutation TP53	Pattern OR_BRCA2	84	17	3.30118e-96	1.25424e-96	0.00217558	55	100	0.125926	0	0.125926	0
12	Mutation ACVR2A	Deletion ACVR2A	9	1	9.45715e-97	1.68574e-71	0	54	100	0.00740741	0	0.00740741	0
65	Mutation APC	Pattern XOR_TCF7L2	106	13	3.18979e-96	1.70808e-109	0.0363708	54	100	0.0962963	0	0.0962963	0
27	Pattern OR_SMAD4	Mutation ATM	26	12	4.63754e-92	1.05562e-94	0.000202828	50	100	0.0888889	0	0.0888889	0
29	Mutation TP53	Mutation BRCA2	84	13	3.18391e-96	2.5515e-96	0.00143031	50	100	0.0962963	0	0.0962963	0
9	Deletion FBXW7	Amplification SMAD2	2	1	1.44924e-17	2.01386e-45	0	49	100	0.0133333	0.00312324	0.0148148	0
34	Mutation APC	Mutation KRAS	106	82	7.67411e-96	3.67743e-94	0.00464134	49	100	0.355556	0	0.36	0.00796272
56	Mutation SMAD4	Pattern XOR_ATM	17	13	1.04279e-28	4.78377e-89	0.00164793	48	100	0.0962963	0	0.0962963	0
16	Deletion RB1	Deletion FBXW7	2	2	0.129902	1.64042e-28	0.000110558	47	100	0.0185185	0.00629509	0.02	0.00357812
20	Pattern OR_SMAD4	Deletion SMAD2	26	5	2.35764e-96	3.70609e-95	0.000189732	47	100	0.037037	0	0.037037	0
15	Deletion TCF7L2	Deletion ATM	2	1	2.69427e-15	4.69653e-45	0	6	100	0.0148148	0	0.0148148	0
42	Pattern OR_PTEN	Mutation SMAD3	12	7	8.33867e-63	2.27879e-78	0.0155538	6	100	0.0518519	0	0.0518519	0
59	Mutation SMAD2	Pattern XOR_IGF2	7	5	6.30602e-19	6.57454e-58	0.000833518	6	100	0.0385185	0.00468486	0.04	0.00936971
33	Mutation SMAD2	Mutation IGF2	7	1	1.00848e-94	7.14882e-75	0	3	100	0.00740741	0	0.00740741	0
38	Pattern XOR_FBXW7	Mutation PIK3R1	18	5	4.66964e-96	4.55147e-86	0.00105736	2	100	0.037037	0	0.037037	0
13	Mutation KRAS	Deletion APC	82	5	2.22081e-96	1.70424e-109	0	0	100	0.037037	0	0.037037	0
1	NA	Amplification AURKA	#NUM!	#NUM!	#NUM!	#NUM!	#NUM!	#NUM!	#NUM!	0.0814815	0	#NUM!	#NUM!
2	NA	Amplification BRAF	#NUM!	#NUM!	#NUM!	#NUM!	#NUM!	#NUM!	#NUM!	0.00740741	0	#NUM!	#NUM!
4	NA	Amplification ERBB2	#NUM!	#NUM!	#NUM!	#NUM!	#NUM!	#NUM!	#NUM!	0.037037	0	#NUM!	#NUM!
5	NA	Amplification IGF2	#NUM!	#NUM!	#NUM!	#NUM!	#NUM!	#NUM!	#NUM!	0.0296296	0	#NUM!	#NUM!
6	NA	Amplification KRAS	#NUM!	#NUM!	#NUM!	#NUM!	#NUM!	#NUM!	#NUM!	0.00740741	0	#NUM!	#NUM!
10	NA	Amplification SOX9	#NUM!	#NUM!	#NUM!	#NUM!	#NUM!	#NUM!	#NUM!	0.0148148	0	#NUM!	#NUM!
11	NA	Amplification TCF7L2	#NUM!	#NUM!	#NUM!	#NUM!	#NUM!	#NUM!	#NUM!	0.0148148	0	#NUM!	#NUM!
14	NA	Deletion ARID1A	#NUM!	#NUM!	#NUM!	#NUM!	#NUM!	#NUM!	#NUM!	0.00740741	0	#NUM!	#NUM!
17	NA	Deletion PIK3R1	#NUM!	#NUM!	#NUM!	#NUM!	#NUM!	#NUM!	#NUM!	0.0148148	0	#NUM!	#NUM!
18	NA	Deletion PTEN	#NUM!	#NUM!	#NUM!	#NUM!	#NUM!	#NUM!	#NUM!	0.0518519	0	#NUM!	#NUM!
19	NA	Deletion RB1	#NUM!	#NUM!	#NUM!	#NUM!	#NUM!	#NUM!	#NUM!	0.0148148	0	#NUM!	#NUM!
21	NA	Deletion SMAD4	#NUM!	#NUM!	#NUM!	#NUM!	#NUM!	#NUM!	#NUM!	0.0888889	0	#NUM!	#NUM!
22	NA	Deletion TCF7L2	#NUM!	#NUM!	#NUM!	#NUM!	#NUM!	#NUM!	#NUM!	0.0148148	0	#NUM!	#NUM!
23	NA	Deletion TP53	#NUM!	#NUM!	#NUM!	#NUM!	#NUM!	#NUM!	#NUM!	0.037037	0	#NUM!	#NUM!
24	NA	Mutation ACVR2A	#NUM!	#NUM!	#NUM!	#NUM!	#NUM!	#NUM!	#NUM!	0.0666667	0	#NUM!	#NUM!
25	NA	Mutation APC	#NUM!	#NUM!	#NUM!	#NUM!	#NUM!	#NUM!	#NUM!	0.214815	0	#NUM!	#NUM!
26	NA	Mutation ARID1A	#NUM!	#NUM!	#NUM!	#NUM!	#NUM!	#NUM!	#NUM!	0.0444444	0	#NUM!	#NUM!
28	NA	Mutation BRAF	#NUM!	#NUM!	#NUM!	#NUM!	#NUM!	#NUM!	#NUM!	0.0666667	0	#NUM!	#NUM!
32	NA	Mutation FBXW7	#NUM!	#NUM!	#NUM!	#NUM!	#NUM!	#NUM!	#NUM!	0.118519	0	#NUM!	#NUM!
35	NA	Mutation MYC	#NUM!	#NUM!	#NUM!	#NUM!	#NUM!	#NUM!	#NUM!	0.037037	0	#NUM!	#NUM!
36	NA	Mutation NRAS	#NUM!	#NUM!	#NUM!	#NUM!	#NUM!	#NUM!	#NUM!	0.0444444	0	#NUM!	#NUM!
37	NA	Mutation PIK3CA	#NUM!	#NUM!	#NUM!	#NUM!	#NUM!	#NUM!	#NUM!	0.362963	0	#NUM!	#NUM!
39	NA	Mutation PTEN	#NUM!	#NUM!	#NUM!	#NUM!	#NUM!	#NUM!	#NUM!	0.0444444	0	#NUM!	#NUM!
40	NA	Mutation RB1	#NUM!	#NUM!	#NUM!	#NUM!	#NUM!	#NUM!	#NUM!	0.00740741	0	#NUM!	#NUM!
41	NA	Mutation SMAD2	#NUM!	#NUM!	#NUM!	#NUM!	#NUM!	#NUM!	#NUM!	0.0518519	0	#NUM!	#NUM!
43	NA	Mutation SMAD4	#NUM!	#NUM!	#NUM!	#NUM!	#NUM!	#NUM!	#NUM!	0.125926	0	#NUM!	#NUM!
44	NA	Mutation SMARCA4	#NUM!	#NUM!	#NUM!	#NUM!	#NUM!	#NUM!	#NUM!	0.0518519	0	#NUM!	#NUM!
45	NA	Mutation SOX9	#NUM!	#NUM!	#NUM!	#NUM!	#NUM!	#NUM!	#NUM!	0.192593	0	#NUM!	#NUM!
46	NA	Mutation TCF7L2	#NUM!	#NUM!	#NUM!	#NUM!	#NUM!	#NUM!	#NUM!	0.0666667	0	#NUM!	#NUM!
47	NA	Mutation TP53	#NUM!	#NUM!	#NUM!	#NUM!	#NUM!	#NUM!	#NUM!	0.377778	0	#NUM!	#NUM!
48	NA	Pattern OR_APC	#NUM!	#NUM!	#NUM!	#NUM!	#NUM!	#NUM!	#NUM!	0.207407	0	#NUM!	#NUM!
49	NA	Pattern OR_APC_CTNNB1	#NUM!	#NUM!	#NUM!	#NUM!	#NUM!	#NUM!	#NUM!	0.177778	0	#NUM!	#NUM!
51	NA	Pattern OR_ERBB2_IGF2_PIK3CA_PTEN	#NUM!	#NUM!	#NUM!	#NUM!	#NUM!	#NUM!	#NUM!	0.591852	0.0450507	#NUM!	#NUM!
52	NA	Pattern OR_KRAS_NRAS_BRAF	#NUM!	#NUM!	#NUM!	#NUM!	#NUM!	#NUM!	#NUM!	0.303704	0	#NUM!	#NUM!
53	NA	Pattern OR_PTEN	#NUM!	#NUM!	#NUM!	#NUM!	#NUM!	#NUM!	#NUM!	0.0888889	0	#NUM!	#NUM!
54	NA	Pattern OR_SMAD4	#NUM!	#NUM!	#NUM!	#NUM!	#NUM!	#NUM!	#NUM!	0.192593	0	#NUM!	#NUM!
55	NA	Pattern XOR_ARID1A	#NUM!	#NUM!	#NUM!	#NUM!	#NUM!	#NUM!	#NUM!	0.0518519	0	#NUM!	#NUM!
57	NA	Pattern XOR_BRAF	#NUM!	#NUM!	#NUM!	#NUM!	#NUM!	#NUM!	#NUM!	0.0740741	0	#NUM!	#NUM!
58	NA	Pattern XOR_FBXW7	#NUM!	#NUM!	#NUM!	#NUM!	#NUM!	#NUM!	#NUM!	0.133333	0	#NUM!	#NUM!
60	NA	Pattern XOR_MYC	#NUM!	#NUM!	#NUM!	#NUM!	#NUM!	#NUM!	#NUM!	0.0888889	0	#NUM!	#NUM!
61	NA	Pattern XOR_PIK3R1	#NUM!	#NUM!	#NUM!	#NUM!	#NUM!	#NUM!	#NUM!	0.0518519	0	#NUM!	#NUM!
62	NA	Pattern XOR_RB1	#NUM!	#NUM!	#NUM!	#NUM!	#NUM!	#NUM!	#NUM!	0.0518519	0	#NUM!	#NUM!
63	NA	Pattern XOR_SMAD2	#NUM!	#NUM!	#NUM!	#NUM!	#NUM!	#NUM!	#NUM!	0.0962963	0	#NUM!	#NUM!
64	NA	Pattern XOR_SOX9	#NUM!	#NUM!	#NUM!	#NUM!	#NUM!	#NUM!	#NUM!	0.207407	0	#NUM!	#NUM!

## Sheet:  Table S1b
Table S1b. Right colon cancer (RCC) PicNiC statistics (aic)
	SELECTS	SELECTED	OBS.SELECTS	OBS.SELECTED	TEMPORAL.PRIORITY	PROBABILITY.RAISING	HYPERGEOMETRIC	NONPAR.BOOT	STAT.BOOT	MEAN.PREDERR	SD.PREDERR	MEAN.POSTERR	SD.POSTERR
9	Amplification BRCA2	Amplification RB1	6	4	3.99936e-25	7.40083e-93	1.13354e-06	100	100	0.017037	0.00357812	0.0177778	0.00382517
74	Mutation APC	Pattern XOR_TCF7L2	106	13	3.18979e-96	1.70808e-109	0.0363708	99	100	0.0962963	0	0.0962963	0
36	Amplification ERBB2	Mutation ERBB2	5	3	1.52636e-32	5.9202e-94	0	96	100	0.0244444	0.00609832	0.0288889	0.00815189
51	Mutation APC	Mutation SMAD4	106	17	3.43353e-96	7.7079e-92	0.0120902	96	100	0.125926	0	0.125926	0
62	Mutation APC	Pattern OR_SMAD4	106	26	3.57256e-96	9.65849e-77	0.0430113	96	100	0.192593	0	0.192593	0
3	Amplification AURKA	Amplification BRCA2	11	6	1.35764e-64	4.33075e-85	0.000342703	93	100	0.0407407	0.00390405	0.0444444	0
70	Mutation SOX9	Pattern XOR_PIK3R1	26	7	2.81153e-96	3.55238e-63	0.0256547	93	100	0.0518519	0	0.0518519	0
31	Mutation BRAF	Mutation ARID1A	9	6	1.57577e-32	6.10589e-60	0.00377407	92	100	0.0444444	0	0.0444444	0
35	Mutation TP53	Mutation CTNNB1	84	7	2.70298e-96	1.70627e-109	0	92	100	0.0518519	0	0.0518519	0
64	Mutation SMAD4	Pattern XOR_ATM	17	13	1.04279e-28	4.78377e-89	0.00164793	92	100	0.0962963	0	0.0962963	0
63	Mutation BRAF	Pattern XOR_ARID1A	9	7	1.87215e-16	6.05451e-59	0.00637699	91	100	0.0518519	0	0.0518519	0
8	Pattern OR_PTEN	Amplification MYC	12	7	1.57562e-56	1.61923e-83	0.00112585	90	100	0.0518519	0	0.0518519	0
58	Mutation TP53	Pattern OR_BRCA2	84	17	3.30118e-96	1.25424e-96	0.00217558	55	100	0.125926	0	0.125926	0
60	Mutation APC	Pattern OR_KRAS_NRAS_BRAF	106	94	9.35524e-78	4.38486e-82	0.0180077	55	100	0.320741	0.0194577	0.32	0.0129718
15	Mutation ACVR2A	Deletion ACVR2A	9	1	9.45715e-97	1.68574e-71	0	54	100	0.00740741	0	0.00740741	0
40	Mutation TP53	Mutation MYC	84	5	2.3e-96	4.0248e-109	0	53	100	0.037037	0	0.037037	0
54	Mutation APC	Mutation TCF7L2	106	9	2.80946e-96	1.70699e-109	0.105067	53	100	0.0666667	0	0.0666667	0
72	Mutation PIK3CA	Pattern XOR_SMAD2	49	13	3.02953e-96	4.13808e-87	0.0121556	53	100	0.0962963	0	0.0962963	0
34	Mutation TP53	Mutation BRCA2	84	13	3.18391e-96	2.5515e-96	0.00143031	52	100	0.0962963	0	0.0962963	0
37	Mutation PIK3CA	Mutation FBXW7	49	16	3.36814e-96	7.53239e-77	0.0221255	52	100	0.118519	0	0.118519	0
66	Mutation PIK3CA	Pattern XOR_FBXW7	49	18	3.3697e-96	2.06347e-77	0.0199035	52	100	0.133333	0	0.133333	0
10	Deletion FBXW7	Amplification SMAD2	2	1	1.44924e-17	2.01386e-45	0	51	100	0.0140741	0.00234243	0.0148148	0
46	Mutation SOX9	Mutation RB1	26	1	2.68679e-97	2.62645e-73	0	51	100	0.00740741	0	0.00740741	0
23	Mutation CTNNB1	Deletion RB1	7	2	8.18128e-82	2.0522e-29	0.00232172	50	100	0.02	0.00499962	0.0148148	0
32	Pattern OR_SMAD4	Mutation ATM	26	12	4.63754e-92	1.05562e-94	0.000202828	50	100	0.0888889	0	0.0888889	0
24	Mutation PIK3CA	Deletion SMAD2	49	5	2.35221e-96	1.34437e-86	0.00550009	49	100	0.0422222	0.00609832	0.037037	0
7	Mutation FBXW7	Amplification KRAS	16	1	2.28735e-97	6.1456e-73	0	48	100	0.00740741	0	0.00740741	0
25	Pattern OR_SMAD4	Deletion SMAD2	26	5	2.35764e-96	3.70609e-95	0.000189732	48	100	0.0422222	0.00609832	0.037037	0
29	Mutation APC	Mutation ACVR2A	106	9	2.81738e-96	1.70566e-109	0.105067	48	100	0.0666667	0	0.0666667	0
48	Mutation PIK3CA	Mutation SMAD2	49	7	2.39299e-96	4.29265e-58	0.0596549	48	100	0.0377778	0.00234243	0.0518519	0
14	Mutation PIK3CA	Amplification TCF7L2	49	2	1.07482e-96	1.41626e-94	0	47	100	0.00962963	0.00357812	0.0148148	0
16	Mutation KRAS	Deletion APC	82	5	2.22081e-96	1.70424e-109	0	47	100	0.037037	0	0.037037	0
47	Mutation ACVR2A	Mutation SMAD2	9	7	1.26772e-20	5.72847e-57	0.00637699	47	100	0.0377778	0.00234243	0.0518519	0
6	Pattern OR_KRAS_NRAS_BRAF	Amplification IGF2	94	4	2.02756e-96	5.28762e-108	0	46	100	0.0296296	0	0.0296296	0
19	Deletion RB1	Deletion FBXW7	2	2	0.129902	1.64042e-28	0.000110558	46	100	0.0222222	0	0.0222222	0
73	Mutation APC	Pattern XOR_SOX9	106	28	3.48772e-96	8.78805e-83	0.0276153	9	100	0.207407	0	0.207407	0
53	Mutation APC	Mutation SOX9	106	26	3.42031e-96	4.95219e-75	0.0430113	8	100	0.192593	0	0.192593	0
39	Mutation APC	Mutation KRAS	106	82	7.67411e-96	3.67743e-94	0.00464134	7	100	0.357037	0.00468486	0.359259	0.00800091
67	Mutation ACVR2A	Pattern XOR_IGF2	9	5	6.18968e-52	6.95862e-58	0.00195414	7	100	0.0237037	0.00468486	0.037037	0
18	Deletion TCF7L2	Deletion ATM	2	1	2.69427e-15	4.69653e-45	0	6	100	0.0140741	0.00234243	0.0133333	0.00312324
44	Pattern XOR_FBXW7	Mutation PIK3R1	18	5	4.66964e-96	4.55147e-86	0.00105736	5	100	0.0466667	0.00357812	0.037037	0
49	Pattern OR_PTEN	Mutation SMAD3	12	7	8.33867e-63	2.27879e-78	0.0155538	5	100	0.0540741	0.00357812	0.0518519	0
12	Mutation ARID1A	Amplification SOX9	6	2	4.29466e-72	1.63965e-25	0.00165837	3	100	0.0177778	0.00382517	0.0148148	0
27	Deletion PTEN	Deletion TCF7L2	7	2	1.82031e-83	1.8501e-29	0.00232172	3	100	0.0148148	0	0.0148148	0
38	Mutation SMAD2	Mutation IGF2	7	1	1.00848e-94	7.14882e-75	0	3	100	0.00740741	0	0.00740741	0
68	Mutation SMAD2	Pattern XOR_IGF2	7	5	6.30602e-19	6.57454e-58	0.000833518	3	100	0.0237037	0.00468486	0.0488889	0.00796272
4	Mutation ARID1A	Amplification BRCA2	6	6	0.331095	3.38423e-47	0.0229312	2	100	0.0407407	0.00390405	0.0466667	0.00702728
41	Mutation APC	Mutation NRAS	106	6	2.45124e-96	1.70492e-109	0.227095	2	100	0.0444444	0	0.0444444	0
13	Mutation ARID1A	Amplification TCF7L2	6	2	2.95696e-73	4.4638e-25	0.00165837	1	100	0.00962963	0.00357812	0.0148148	0
43	Amplification MYC	Mutation PIK3R1	7	5	1.62546e-20	2.0151e-57	0.000833518	1	100	0.0466667	0.00357812	0.0385185	0.00312324
50	Pattern XOR_SMAD2	Mutation SMAD3	13	7	8.18029e-76	9.11121e-56	0.0197414	1	100	0.0540741	0.00357812	0.0518519	0
11	Amplification MYC	Amplification SOX9	7	2	2.71895e-83	5.93655e-27	0.00232172	0	100	0.0177778	0.00382517	0.0148148	0
20	Mutation KRAS	Deletion PIK3R1	82	2	1.04122e-96	1.11874e-98	0	0	100	0.0148148	0	0.0148148	0
22	Deletion PTEN	Deletion RB1	7	2	8.97579e-83	1.83977e-26	0.00232172	0	100	0.02	0.00499962	0.0148148	0
28	Mutation APC	Deletion TP53	106	5	2.099e-96	4.01949e-109	0.292301	0	100	0.037037	0	0.037037	0
1	NA	Amplification AURKA	#NUM!	#NUM!	#NUM!	#NUM!	#NUM!	#NUM!	#NUM!	0.0814815	0	#NUM!	#NUM!
2	NA	Amplification BRAF	#NUM!	#NUM!	#NUM!	#NUM!	#NUM!	#NUM!	#NUM!	0.00740741	0	#NUM!	#NUM!
5	NA	Amplification ERBB2	#NUM!	#NUM!	#NUM!	#NUM!	#NUM!	#NUM!	#NUM!	0.037037	0	#NUM!	#NUM!
17	NA	Deletion ARID1A	#NUM!	#NUM!	#NUM!	#NUM!	#NUM!	#NUM!	#NUM!	0.00740741	0	#NUM!	#NUM!
21	NA	Deletion PTEN	#NUM!	#NUM!	#NUM!	#NUM!	#NUM!	#NUM!	#NUM!	0.0518519	0	#NUM!	#NUM!
26	NA	Deletion SMAD4	#NUM!	#NUM!	#NUM!	#NUM!	#NUM!	#NUM!	#NUM!	0.0888889	0	#NUM!	#NUM!
30	NA	Mutation APC	#NUM!	#NUM!	#NUM!	#NUM!	#NUM!	#NUM!	#NUM!	0.214815	0	#NUM!	#NUM!
33	NA	Mutation BRAF	#NUM!	#NUM!	#NUM!	#NUM!	#NUM!	#NUM!	#NUM!	0.0666667	0	#NUM!	#NUM!
42	NA	Mutation PIK3CA	#NUM!	#NUM!	#NUM!	#NUM!	#NUM!	#NUM!	#NUM!	0.362963	0	#NUM!	#NUM!
45	NA	Mutation PTEN	#NUM!	#NUM!	#NUM!	#NUM!	#NUM!	#NUM!	#NUM!	0.0444444	0	#NUM!	#NUM!
52	NA	Mutation SMARCA4	#NUM!	#NUM!	#NUM!	#NUM!	#NUM!	#NUM!	#NUM!	0.0518519	0	#NUM!	#NUM!
55	NA	Mutation TP53	#NUM!	#NUM!	#NUM!	#NUM!	#NUM!	#NUM!	#NUM!	0.377778	0	#NUM!	#NUM!
56	NA	Pattern OR_APC	#NUM!	#NUM!	#NUM!	#NUM!	#NUM!	#NUM!	#NUM!	0.207407	0	#NUM!	#NUM!
57	NA	Pattern OR_APC_CTNNB1	#NUM!	#NUM!	#NUM!	#NUM!	#NUM!	#NUM!	#NUM!	0.177778	0	#NUM!	#NUM!
59	NA	Pattern OR_ERBB2_IGF2_PIK3CA_PTEN	#NUM!	#NUM!	#NUM!	#NUM!	#NUM!	#NUM!	#NUM!	0.586667	0.0378994	#NUM!	#NUM!
61	NA	Pattern OR_PTEN	#NUM!	#NUM!	#NUM!	#NUM!	#NUM!	#NUM!	#NUM!	0.0888889	0	#NUM!	#NUM!
65	NA	Pattern XOR_BRAF	#NUM!	#NUM!	#NUM!	#NUM!	#NUM!	#NUM!	#NUM!	0.0740741	0	#NUM!	#NUM!
69	NA	Pattern XOR_MYC	#NUM!	#NUM!	#NUM!	#NUM!	#NUM!	#NUM!	#NUM!	0.0888889	0	#NUM!	#NUM!
71	NA	Pattern XOR_RB1	#NUM!	#NUM!	#NUM!	#NUM!	#NUM!	#NUM!	#NUM!	0.0518519	0	#NUM!	#NUM!

## Sheet: Table S2a
Table S2a. Left colon cancer (LCC) PicNiC statistics (bic)
	SELECTS	SELECTED	OBS.SELECTS	OBS.SELECTED	TEMPORAL.PRIORITY	PROBABILITY.RAISING	HYPERGEOMETRIC	NONPAR.BOOT	STAT.BOOT	MEAN.PREDERR	SD.PREDERR	MEAN.POSTERR	SD.POSTERR
15	Deletion SMAD4	Deletion TP53	7	1	6.18556e-91	6.95221e-66	0.048951	60	100	0.00699301	0	0.00699301	0
8	Amplification AURKA	Amplification MYC	13	11	5.86621e-14	8.83242e-84	0.000948016	42	100	0.0769231	0	0.0769231	0
3	Mutation KRAS	Amplification BRCA2	45	5	2.11343e-93	3.51746e-89	0.00263136	40	100	0.034965	0	0.034965	0
6	Mutation CTNNB1	Amplification IGF2	6	2	1.31952e-71	1.01704e-91	0	40	100	0.0188811	0.0081084	0.0160839	0.00471992
22	Mutation ATM	Mutation DKK4	12	1	1.71746e-94	7.67512e-69	0	39	100	0.00699301	0	0.00699301	0
39	Amplification AURKA	Pattern XOR_ARID1A	13	12	4.18097e-07	4.26956e-82	0.0137705	39	100	0.0839161	0	0.0839161	0
21	Mutation PIK3CA	Mutation CTNNB1	24	6	2.54843e-93	9.99496e-89	0.000486239	35	100	0.041958	0	0.041958	0
14	Pattern OR_KRAS_NRAS_BRAF	Deletion TCF7L2	55	3	1.23065e-93	6.69661e-104	0	18	100	0.020979	0	0.020979	0
1	Amplification BRCA2	Amplification ATM	5	1	4.25934e-81	1.42713e-68	0	9	100	0.00699301	0	0.00699301	0
43	Mutation CTNNB1	Pattern XOR_IGF2	6	4	7.04657e-30	2.94059e-60	0.000164953	8	100	0.0293706	0.00442277	0.0321678	0.00488955
28	Pattern OR_KRAS_NRAS_BRAF	Mutation PIK3CA	55	24	3.13117e-93	3.77166e-93	8.10746e-05	6	100	0.167832	0	0.167832	0
2	NA	Amplification AURKA	#NUM!	#NUM!	#NUM!	#NUM!	#NUM!	#NUM!	#NUM!	0.0909091	0	#NUM!	#NUM!
4	NA	Amplification DKK4	#NUM!	#NUM!	#NUM!	#NUM!	#NUM!	#NUM!	#NUM!	0.0909091	0	#NUM!	#NUM!
5	NA	Amplification ERBB2	#NUM!	#NUM!	#NUM!	#NUM!	#NUM!	#NUM!	#NUM!	0.034965	0	#NUM!	#NUM!
7	NA	Amplification KRAS	#NUM!	#NUM!	#NUM!	#NUM!	#NUM!	#NUM!	#NUM!	0.00699301	0	#NUM!	#NUM!
9	NA	Deletion APC	#NUM!	#NUM!	#NUM!	#NUM!	#NUM!	#NUM!	#NUM!	0.013986	0	#NUM!	#NUM!
10	NA	Deletion ARID1A	#NUM!	#NUM!	#NUM!	#NUM!	#NUM!	#NUM!	#NUM!	0.00699301	0	#NUM!	#NUM!
11	NA	Deletion PTEN	#NUM!	#NUM!	#NUM!	#NUM!	#NUM!	#NUM!	#NUM!	0.034965	0	#NUM!	#NUM!
12	NA	Deletion SMAD4	#NUM!	#NUM!	#NUM!	#NUM!	#NUM!	#NUM!	#NUM!	0.048951	0	#NUM!	#NUM!
13	NA	Deletion SOX9	#NUM!	#NUM!	#NUM!	#NUM!	#NUM!	#NUM!	#NUM!	0.013986	0	#NUM!	#NUM!
16	NA	Mutation APC	#NUM!	#NUM!	#NUM!	#NUM!	#NUM!	#NUM!	#NUM!	0.181818	0	#NUM!	#NUM!
17	NA	Mutation ARID1A	#NUM!	#NUM!	#NUM!	#NUM!	#NUM!	#NUM!	#NUM!	0.0769231	0	#NUM!	#NUM!
18	NA	Mutation ATM	#NUM!	#NUM!	#NUM!	#NUM!	#NUM!	#NUM!	#NUM!	0.0839161	0	#NUM!	#NUM!
19	NA	Mutation BRAF	#NUM!	#NUM!	#NUM!	#NUM!	#NUM!	#NUM!	#NUM!	0.020979	0	#NUM!	#NUM!
20	NA	Mutation BRCA2	#NUM!	#NUM!	#NUM!	#NUM!	#NUM!	#NUM!	#NUM!	0.041958	0	#NUM!	#NUM!
23	NA	Mutation ERBB2	#NUM!	#NUM!	#NUM!	#NUM!	#NUM!	#NUM!	#NUM!	0.013986	0	#NUM!	#NUM!
24	NA	Mutation FBXW7	#NUM!	#NUM!	#NUM!	#NUM!	#NUM!	#NUM!	#NUM!	0.0979021	0	#NUM!	#NUM!
25	NA	Mutation IGF2	#NUM!	#NUM!	#NUM!	#NUM!	#NUM!	#NUM!	#NUM!	0.013986	0	#NUM!	#NUM!
26	NA	Mutation KRAS	#NUM!	#NUM!	#NUM!	#NUM!	#NUM!	#NUM!	#NUM!	0.314685	0	#NUM!	#NUM!
27	NA	Mutation NRAS	#NUM!	#NUM!	#NUM!	#NUM!	#NUM!	#NUM!	#NUM!	0.048951	0	#NUM!	#NUM!
29	NA	Mutation PTEN	#NUM!	#NUM!	#NUM!	#NUM!	#NUM!	#NUM!	#NUM!	0.041958	0	#NUM!	#NUM!
30	NA	Mutation SMAD4	#NUM!	#NUM!	#NUM!	#NUM!	#NUM!	#NUM!	#NUM!	0.0839161	0	#NUM!	#NUM!
31	NA	Mutation SOX9	#NUM!	#NUM!	#NUM!	#NUM!	#NUM!	#NUM!	#NUM!	0.0909091	0	#NUM!	#NUM!
32	NA	Mutation TCF7L2	#NUM!	#NUM!	#NUM!	#NUM!	#NUM!	#NUM!	#NUM!	0.0909091	0	#NUM!	#NUM!
33	NA	Mutation TP53	#NUM!	#NUM!	#NUM!	#NUM!	#NUM!	#NUM!	#NUM!	0.244755	0	#NUM!	#NUM!
34	NA	Pattern OR_APC	#NUM!	#NUM!	#NUM!	#NUM!	#NUM!	#NUM!	#NUM!	0.174825	0	#NUM!	#NUM!
35	NA	Pattern OR_APC_CTNNB1	#NUM!	#NUM!	#NUM!	#NUM!	#NUM!	#NUM!	#NUM!	0.153846	0	#NUM!	#NUM!
36	NA	Pattern OR_ERBB2	#NUM!	#NUM!	#NUM!	#NUM!	#NUM!	#NUM!	#NUM!	0.041958	0	#NUM!	#NUM!
37	NA	Pattern OR_ERBB2_IGF2_PIK3CA_PTEN	#NUM!	#NUM!	#NUM!	#NUM!	#NUM!	#NUM!	#NUM!	0.272727	0	#NUM!	#NUM!
38	NA	Pattern OR_KRAS_NRAS_BRAF	#NUM!	#NUM!	#NUM!	#NUM!	#NUM!	#NUM!	#NUM!	0.384615	0	#NUM!	#NUM!
40	NA	Pattern XOR_ATM	#NUM!	#NUM!	#NUM!	#NUM!	#NUM!	#NUM!	#NUM!	0.0909091	0	#NUM!	#NUM!
41	NA	Pattern XOR_BRCA2	#NUM!	#NUM!	#NUM!	#NUM!	#NUM!	#NUM!	#NUM!	0.0769231	0	#NUM!	#NUM!
42	NA	Pattern XOR_DKK4	#NUM!	#NUM!	#NUM!	#NUM!	#NUM!	#NUM!	#NUM!	0.0979021	0	#NUM!	#NUM!
44	NA	Pattern XOR_KRAS	#NUM!	#NUM!	#NUM!	#NUM!	#NUM!	#NUM!	#NUM!	0.321678	0	#NUM!	#NUM!
45	NA	Pattern XOR_PTEN	#NUM!	#NUM!	#NUM!	#NUM!	#NUM!	#NUM!	#NUM!	0.0769231	0	#NUM!	#NUM!
46	NA	Pattern XOR_SMAD4	#NUM!	#NUM!	#NUM!	#NUM!	#NUM!	#NUM!	#NUM!	0.132867	0	#NUM!	#NUM!
47	NA	Pattern XOR_SOX9	#NUM!	#NUM!	#NUM!	#NUM!	#NUM!	#NUM!	#NUM!	0.104895	0	#NUM!	#NUM!
48	NA	Pattern XOR_TCF7L2	#NUM!	#NUM!	#NUM!	#NUM!	#NUM!	#NUM!	#NUM!	0.111888	0	#NUM!	#NUM!

## Sheet: Table S2b
Table S2b: Left colon cancer (LCC) PicNiC statistics (aic)
	SELECTS	SELECTED	OBS.SELECTS	OBS.SELECTED	TEMPORAL.PRIORITY	PROBABILITY.RAISING	HYPERGEOMETRIC	NONPAR.BOOT	STAT.BOOT	MEAN.PREDERR	SD.PREDERR	MEAN.POSTERR	SD.POSTERR
17	Amplification MYC	Deletion TP53	11	1	1.0403e-93	7.48901e-66	0.0769231	61	100	0.0034965	0.00368564	0.00699301	0
52	Mutation APC	Pattern XOR_TCF7L2	117	16	2.78079e-93	3.39622e-79	0.16718	57	100	0.111888	0	0.111888	0
25	Mutation ATM	Mutation DKK4	12	1	1.71746e-94	7.67512e-69	0	54	100	0.00699301	0	0.00699301	0
18	Deletion SMAD4	Deletion TP53	7	1	6.18556e-91	6.95221e-66	0.048951	46	100	0.0034965	0.00368564	0.00699301	0
4	Mutation KRAS	Amplification BRCA2	45	5	2.11343e-93	3.51746e-89	0.00263136	44	100	0.0314685	0.00368564	0.034965	0
41	Mutation KRAS	Pattern OR_ERBB2_IGF2_PIK3CA_PTEN	45	39	3.32213e-30	7.50762e-84	0.018481	44	100	0.272727	0	0.272727	0
10	Amplification AURKA	Amplification MYC	13	11	5.86621e-14	8.83242e-84	0.000948016	42	100	0.0769231	0	0.0769231	0
43	Amplification AURKA	Pattern XOR_ARID1A	13	12	4.18097e-07	4.26956e-82	0.0137705	42	100	0.086014	0.00663415	0.0846154	0.00221138
24	Mutation PIK3CA	Mutation CTNNB1	24	6	2.54843e-93	9.99496e-89	0.000486239	37	100	0.041958	0	0.041958	0
35	Mutation FBXW7	Mutation SOX9	14	13	0.00034579	9.10981e-61	0.0249542	36	100	0.0909091	0	0.0909091	0
16	Pattern OR_KRAS_NRAS_BRAF	Deletion TCF7L2	55	3	1.23065e-93	6.69661e-104	0	33	100	0.020979	0	0.020979	0
26	Amplification ERBB2	Mutation ERBB2	5	2	4.33301e-54	7.25637e-30	0.000984931	32	100	0.0118881	0.00337794	0.013986	0
12	Amplification DKK4	Deletion ARID1A	13	1	1.33986e-94	4.10109e-65	0.0909091	27	100	0.00699301	0	0.00699301	0
2	Mutation CTNNB1	Amplification ATM	6	1	8.54303e-88	6.68987e-69	0	26	100	0.0041958	0.00361117	0.00699301	0
11	Mutation FBXW7	Deletion APC	14	2	1.78642e-93	1.24036e-31	0.00896287	24	100	0.013986	0	0.013986	0
45	Mutation KRAS	Pattern XOR_BRCA2	45	11	2.66028e-93	3.67024e-72	0.0233057	24	100	0.0769231	0	0.0769231	0
8	Mutation CTNNB1	Amplification IGF2	6	2	1.31952e-71	1.01704e-91	0	23	100	0.0174825	0.0049448	0.0181818	0.00488955
20	Mutation TCF7L2	Mutation ARID1A	13	11	1.73315e-11	3.89713e-68	0.0634899	22	100	0.0769231	0	0.0769231	0
37	Mutation APC	Mutation TP53	117	108	7.08314e-60	3.35372e-73	0.0604194	22	100	0.244755	0	0.246853	0.00337794
23	Mutation APC	Mutation BRCA2	117	6	1.97523e-93	3.87358e-106	0.292872	21	100	0.041958	0	0.041958	0
1	Amplification BRCA2	Amplification ATM	5	1	4.25934e-81	1.42713e-68	0	12	100	0.0041958	0.00361117	0.00699301	0
14	Mutation TP53	Deletion SMAD4	108	7	2.34532e-93	3.88108e-106	0	11	100	0.048951	0	0.048951	0
28	Mutation KRAS	Mutation FBXW7	45	14	2.86059e-93	8.47654e-68	0.0337864	10	100	0.0979021	0	0.0979021	0
47	Mutation CTNNB1	Pattern XOR_IGF2	6	4	7.04657e-30	2.94059e-60	0.000164953	10	100	0.0314685	0.0049448	0.0321678	0.00751726
22	Mutation PTEN	Mutation BRAF	6	3	1.34889e-42	1.45744e-11	0.00434836	8	100	0.020979	0	0.020979	0
27	Mutation ATM	Mutation ERBB2	12	2	1.82658e-93	2.28874e-29	0.00650054	7	100	0.0118881	0.00337794	0.013986	0
6	Amplification AURKA	Amplification DKK4	13	13	0.0110712	6.41657e-67	0.0984327	6	100	0.0909091	0	0.0909091	0
32	Pattern OR_KRAS_NRAS_BRAF	Mutation PIK3CA	55	24	3.13117e-93	3.77166e-93	8.10746e-05	6	100	0.167832	0	0.167832	0
5	Mutation PTEN	Amplification BRCA2	6	5	3.96871e-05	5.49283e-12	0.0139491	5	100	0.0314685	0.00368564	0.034965	0
3	NA	Amplification AURKA	#NUM!	#NUM!	#NUM!	#NUM!	#NUM!	#NUM!	#NUM!	0.0909091	0	#NUM!	#NUM!
7	NA	Amplification ERBB2	#NUM!	#NUM!	#NUM!	#NUM!	#NUM!	#NUM!	#NUM!	0.034965	0	#NUM!	#NUM!
9	NA	Amplification KRAS	#NUM!	#NUM!	#NUM!	#NUM!	#NUM!	#NUM!	#NUM!	0.00699301	0	#NUM!	#NUM!
13	NA	Deletion PTEN	#NUM!	#NUM!	#NUM!	#NUM!	#NUM!	#NUM!	#NUM!	0.034965	0	#NUM!	#NUM!
15	NA	Deletion SOX9	#NUM!	#NUM!	#NUM!	#NUM!	#NUM!	#NUM!	#NUM!	0.013986	0	#NUM!	#NUM!
19	NA	Mutation APC	#NUM!	#NUM!	#NUM!	#NUM!	#NUM!	#NUM!	#NUM!	0.181818	0	#NUM!	#NUM!
21	NA	Mutation ATM	#NUM!	#NUM!	#NUM!	#NUM!	#NUM!	#NUM!	#NUM!	0.0839161	0	#NUM!	#NUM!
29	NA	Mutation IGF2	#NUM!	#NUM!	#NUM!	#NUM!	#NUM!	#NUM!	#NUM!	0.013986	0	#NUM!	#NUM!
30	NA	Mutation KRAS	#NUM!	#NUM!	#NUM!	#NUM!	#NUM!	#NUM!	#NUM!	0.314685	0	#NUM!	#NUM!
31	NA	Mutation NRAS	#NUM!	#NUM!	#NUM!	#NUM!	#NUM!	#NUM!	#NUM!	0.048951	0	#NUM!	#NUM!
33	NA	Mutation PTEN	#NUM!	#NUM!	#NUM!	#NUM!	#NUM!	#NUM!	#NUM!	0.041958	0	#NUM!	#NUM!
34	NA	Mutation SMAD4	#NUM!	#NUM!	#NUM!	#NUM!	#NUM!	#NUM!	#NUM!	0.0839161	0	#NUM!	#NUM!
36	NA	Mutation TCF7L2	#NUM!	#NUM!	#NUM!	#NUM!	#NUM!	#NUM!	#NUM!	0.0909091	0	#NUM!	#NUM!
38	NA	Pattern OR_APC	#NUM!	#NUM!	#NUM!	#NUM!	#NUM!	#NUM!	#NUM!	0.174825	0	#NUM!	#NUM!
39	NA	Pattern OR_APC_CTNNB1	#NUM!	#NUM!	#NUM!	#NUM!	#NUM!	#NUM!	#NUM!	0.153846	0	#NUM!	#NUM!
40	NA	Pattern OR_ERBB2	#NUM!	#NUM!	#NUM!	#NUM!	#NUM!	#NUM!	#NUM!	0.041958	0	#NUM!	#NUM!
42	NA	Pattern OR_KRAS_NRAS_BRAF	#NUM!	#NUM!	#NUM!	#NUM!	#NUM!	#NUM!	#NUM!	0.384615	0	#NUM!	#NUM!
44	NA	Pattern XOR_ATM	#NUM!	#NUM!	#NUM!	#NUM!	#NUM!	#NUM!	#NUM!	0.0909091	0	#NUM!	#NUM!
46	NA	Pattern XOR_DKK4	#NUM!	#NUM!	#NUM!	#NUM!	#NUM!	#NUM!	#NUM!	0.0979021	0	#NUM!	#NUM!
48	NA	Pattern XOR_KRAS	#NUM!	#NUM!	#NUM!	#NUM!	#NUM!	#NUM!	#NUM!	0.321678	0	#NUM!	#NUM!
49	NA	Pattern XOR_PTEN	#NUM!	#NUM!	#NUM!	#NUM!	#NUM!	#NUM!	#NUM!	0.0769231	0	#NUM!	#NUM!
50	NA	Pattern XOR_SMAD4	#NUM!	#NUM!	#NUM!	#NUM!	#NUM!	#NUM!	#NUM!	0.132867	0	#NUM!	#NUM!
51	NA	Pattern XOR_SOX9	#NUM!	#NUM!	#NUM!	#NUM!	#NUM!	#NUM!	#NUM!	0.104895	0	#NUM!	#NUM!

## Sheet: Table S3a
Table S3a. Rectal cancer PicNiC statistics (bic)
	SELECTS	SELECTED	OBS.SELECTS	OBS.SELECTED	TEMPORAL.PRIORITY	PROBABILITY.RAISING	HYPERGEOMETRIC	NONPAR.BOOT	STAT.BOOT	MEAN.PREDERR	SD.PREDERR	MEAN.POSTERR	SD.POSTERR
20	Mutation KRAS	Mutation ARID1A	37	5	2.16057e-96	9.47235e-109	0	55	100	0.0657895	0	0.0657895	0
24	Mutation SMAD4	Mutation BRCA2	13	4	2.86201e-94	6.47141e-88	0.000557298	53	100	0.0526316	0	0.0526316	0
29	Mutation NRAS	Mutation IRS2	6	1	4.93004e-88	1.73809e-74	0	50	100	0.0131579	0	0.0131579	0
5	Mutation ERBB2	Amplification ERBB2	5	3	6.04946e-29	3.50683e-61	0.0102418	48	100	0.0618421	0.0108325	0.0671053	0.00970875
35	Mutation PIK3CA	Mutation SMAD4	14	13	0.000233405	1.10912e-92	0.00151625	47	100	0.206579	0.0224071	0.190789	0.0178159
10	Amplification AURKA	Amplification NRAS	6	1	5.06011e-92	1.58285e-71	0	46	100	0.0131579	0	0.0131579	0
16	Deletion SMAD4	Deletion SMAD2	5	2	3.16161e-58	1.75733e-95	0	32	100	0.0407895	0.00970875	0.0460526	0.0142122
2	Amplification IGF2	Amplification AXIN2	4	1	9.14677e-68	2.14794e-63	0.0526316	29	100	0.0197368	0.0111821	0.0157895	0.00554786
13	Deletion SMAD2	Deletion DKK4	2	1	3.49627e-21	2.73703e-49	0	26	100	0.0263158	0	0.0263158	0
15	Deletion SMAD4	Deletion PTEN	5	1	1.56841e-86	3.72408e-74	0	24	100	0.0131579	0	0.0131579	0
7	Pattern XOR_BRCA2	Amplification IRS2	5	4	6.15942e-09	1.00055e-56	0.000557298	22	100	0.0710526	0.0141443	0.075	0.0108325
48	Mutation NRAS	Pattern XOR_IRS2	6	5	6.22356e-08	1.3156e-63	0.00267153	13	100	0.075	0.0108325	0.0671053	0.00416089
22	Mutation PTEN	Mutation AXIN2	4	3	8.76325e-10	5.44707e-66	0.00620199	8	100	0.0657895	0	0.0618421	0.0088809
12	Mutation BRAF	Deletion AXIN2	2	1	2.8435e-21	6.69569e-41	0.0263158	4	100	0.0263158	0	0.0236842	0.00832178
26	Amplification IGF2	Mutation DKK4	4	1	1.47118e-66	3.79156e-64	0.0526316	1	100	0.0144737	0.00416089	0.0171053	0.0088809
1	NA	Amplification AURKA	#NUM!	#NUM!	#NUM!	#NUM!	#NUM!	#NUM!	#NUM!	0.0789474	0	#NUM!	#NUM!
3	NA	Amplification BRCA2	#NUM!	#NUM!	#NUM!	#NUM!	#NUM!	#NUM!	#NUM!	0.0131579	0	#NUM!	#NUM!
4	NA	Amplification DKK4	#NUM!	#NUM!	#NUM!	#NUM!	#NUM!	#NUM!	#NUM!	0.0263158	0	#NUM!	#NUM!
6	NA	Amplification IGF2	#NUM!	#NUM!	#NUM!	#NUM!	#NUM!	#NUM!	#NUM!	0.0526316	0	#NUM!	#NUM!
8	NA	Amplification KRAS	#NUM!	#NUM!	#NUM!	#NUM!	#NUM!	#NUM!	#NUM!	0.0263158	0	#NUM!	#NUM!
9	NA	Amplification MYC	#NUM!	#NUM!	#NUM!	#NUM!	#NUM!	#NUM!	#NUM!	0.0921053	0	#NUM!	#NUM!
11	NA	Deletion APC	#NUM!	#NUM!	#NUM!	#NUM!	#NUM!	#NUM!	#NUM!	0.0263158	0	#NUM!	#NUM!
14	NA	Deletion KRAS	#NUM!	#NUM!	#NUM!	#NUM!	#NUM!	#NUM!	#NUM!	0.0131579	0	#NUM!	#NUM!
17	NA	Deletion SMAD4	#NUM!	#NUM!	#NUM!	#NUM!	#NUM!	#NUM!	#NUM!	0.0657895	0	#NUM!	#NUM!
18	NA	Deletion TP53	#NUM!	#NUM!	#NUM!	#NUM!	#NUM!	#NUM!	#NUM!	0.0131579	0	#NUM!	#NUM!
19	NA	Mutation APC	#NUM!	#NUM!	#NUM!	#NUM!	#NUM!	#NUM!	#NUM!	0.0921053	0	#NUM!	#NUM!
21	NA	Mutation ATM	#NUM!	#NUM!	#NUM!	#NUM!	#NUM!	#NUM!	#NUM!	0.0657895	0	#NUM!	#NUM!
23	NA	Mutation BRAF	#NUM!	#NUM!	#NUM!	#NUM!	#NUM!	#NUM!	#NUM!	0.0263158	0	#NUM!	#NUM!
25	NA	Mutation CTNNB1	#NUM!	#NUM!	#NUM!	#NUM!	#NUM!	#NUM!	#NUM!	0.0263158	0	#NUM!	#NUM!
27	NA	Mutation ERBB2	#NUM!	#NUM!	#NUM!	#NUM!	#NUM!	#NUM!	#NUM!	0.0657895	0	#NUM!	#NUM!
28	NA	Mutation FBXW7	#NUM!	#NUM!	#NUM!	#NUM!	#NUM!	#NUM!	#NUM!	0.157895	0	#NUM!	#NUM!
30	NA	Mutation KRAS	#NUM!	#NUM!	#NUM!	#NUM!	#NUM!	#NUM!	#NUM!	0.605263	0.0641611	#NUM!	#NUM!
31	NA	Mutation NRAS	#NUM!	#NUM!	#NUM!	#NUM!	#NUM!	#NUM!	#NUM!	0.0789474	0	#NUM!	#NUM!
32	NA	Mutation PIK3CA	#NUM!	#NUM!	#NUM!	#NUM!	#NUM!	#NUM!	#NUM!	0.184211	0	#NUM!	#NUM!
33	NA	Mutation PTEN	#NUM!	#NUM!	#NUM!	#NUM!	#NUM!	#NUM!	#NUM!	0.0526316	0	#NUM!	#NUM!
34	NA	Mutation SMAD2	#NUM!	#NUM!	#NUM!	#NUM!	#NUM!	#NUM!	#NUM!	0.0657895	0	#NUM!	#NUM!
36	NA	Mutation SOX9	#NUM!	#NUM!	#NUM!	#NUM!	#NUM!	#NUM!	#NUM!	0.0789474	0	#NUM!	#NUM!
37	NA	Mutation TCF7L2	#NUM!	#NUM!	#NUM!	#NUM!	#NUM!	#NUM!	#NUM!	0.118421	0	#NUM!	#NUM!
38	NA	Mutation TP53	#NUM!	#NUM!	#NUM!	#NUM!	#NUM!	#NUM!	#NUM!	0.210526	0	#NUM!	#NUM!
39	NA	Pattern OR_APC_CTNNB1	#NUM!	#NUM!	#NUM!	#NUM!	#NUM!	#NUM!	#NUM!	0.0789474	0	#NUM!	#NUM!
40	NA	Pattern OR_ERBB2	#NUM!	#NUM!	#NUM!	#NUM!	#NUM!	#NUM!	#NUM!	0.0789474	0	#NUM!	#NUM!
41	NA	Pattern OR_ERBB2_IGF2_PIK3CA_PTEN	#NUM!	#NUM!	#NUM!	#NUM!	#NUM!	#NUM!	#NUM!	0.355263	0	#NUM!	#NUM!
42	NA	Pattern OR_KRAS	#NUM!	#NUM!	#NUM!	#NUM!	#NUM!	#NUM!	#NUM!	0.643421	0.0379582	#NUM!	#NUM!
43	NA	Pattern OR_KRAS_NRAS_BRAF	#NUM!	#NUM!	#NUM!	#NUM!	#NUM!	#NUM!	#NUM!	0.394737	0	#NUM!	#NUM!
44	NA	Pattern OR_SMAD4	#NUM!	#NUM!	#NUM!	#NUM!	#NUM!	#NUM!	#NUM!	0.210526	0	#NUM!	#NUM!
45	NA	Pattern XOR_AXIN2	#NUM!	#NUM!	#NUM!	#NUM!	#NUM!	#NUM!	#NUM!	0.0657895	0	#NUM!	#NUM!
46	NA	Pattern XOR_BRCA2	#NUM!	#NUM!	#NUM!	#NUM!	#NUM!	#NUM!	#NUM!	0.0657895	0	#NUM!	#NUM!
47	NA	Pattern XOR_DKK4	#NUM!	#NUM!	#NUM!	#NUM!	#NUM!	#NUM!	#NUM!	0.0526316	0	#NUM!	#NUM!
49	NA	Pattern XOR_NRAS	#NUM!	#NUM!	#NUM!	#NUM!	#NUM!	#NUM!	#NUM!	0.0921053	0	#NUM!	#NUM!
50	NA	Pattern XOR_PTEN	#NUM!	#NUM!	#NUM!	#NUM!	#NUM!	#NUM!	#NUM!	0.0657895	0	#NUM!	#NUM!
51	NA	Pattern XOR_SMAD2	#NUM!	#NUM!	#NUM!	#NUM!	#NUM!	#NUM!	#NUM!	0.0921053	0	#NUM!	#NUM!
52	NA	Pattern XOR_TP53	#NUM!	#NUM!	#NUM!	#NUM!	#NUM!	#NUM!	#NUM!	0.197368	0	#NUM!	#NUM!

## Sheet: Table S3b
Table S3b: Rectal cancer PicNiC statistics (aic)
	SELECTS	SELECTED	OBS.SELECTS	OBS.SELECTED	TEMPORAL.PRIORITY	PROBABILITY.RAISING	HYPERGEOMETRIC	NONPAR.BOOT	STAT.BOOT	MEAN.PREDERR	SD.PREDERR	MEAN.POSTERR	SD.POSTERR
20	Mutation PIK3CA	Deletion TP53	14	1	2.98408e-97	7.95213e-72	0	66	100	0.0131579	0	0.0131579	0
9	Mutation TP53	Amplification MYC	60	7	2.44371e-96	1.7e-109	0	52	100	0.0921053	0	0.0921053	0
32	Mutation NRAS	Mutation IRS2	6	1	4.93004e-88	1.73809e-74	0	52	100	0.0131579	0	0.0131579	0
26	Mutation SMAD4	Mutation BRCA2	13	4	2.86201e-94	6.47141e-88	0.000557298	51	100	0.0578947	0.00920008	0.0526316	0
5	Mutation ERBB2	Amplification ERBB2	5	3	6.04946e-29	3.50683e-61	0.0102418	48	100	0.0539474	0.00970875	0.0605263	0.0110957
38	Mutation PIK3CA	Mutation SMAD4	14	13	0.000233405	1.10912e-92	0.00151625	48	100	0.194737	0.0246552	0.202632	0.0241825
44	Mutation KRAS	Pattern OR_ERBB2_IGF2_PIK3CA_PTEN	37	27	5.97691e-82	5.00856e-89	0.0180033	48	100	0.385526	0.0328508	0.368421	0.0316276
10	Amplification AURKA	Amplification NRAS	6	1	5.06011e-92	1.58285e-71	0	46	100	0.0131579	0	0.0131579	0
18	Mutation SMAD4	Deletion SMAD2	13	2	1.10819e-96	1.08147e-98	0	45	100	0.00131579	0.00416089	0.0263158	0
19	Mutation TP53	Deletion SMAD4	60	5	2.01846e-96	1.69805e-109	0	42	100	0.0657895	0	0.0657895	0
49	Mutation TP53	Pattern XOR_BRCA2	60	5	1.83299e-96	9.44855e-109	0	40	100	0.0657895	0	0.0657895	0
31	Pattern OR_APC_CTNNB1	Mutation FBXW7	70	12	1.94163e-96	4.00039e-109	0	39	100	0.157895	0	0.157895	0
22	Mutation KRAS	Mutation ARID1A	37	5	2.16057e-96	9.47235e-109	0	38	100	0.0657895	0	0.0657895	0
51	Mutation NRAS	Pattern XOR_IRS2	6	5	6.22356e-08	1.3156e-63	0.00267153	34	100	0.0710526	0.00920008	0.0723684	0.00930404
17	Deletion SMAD4	Deletion SMAD2	5	2	3.16161e-58	1.75733e-95	0	33	100	0.00131579	0.00416089	0.0289474	0.00832178
2	Amplification IGF2	Amplification AXIN2	4	1	9.14677e-68	2.14794e-63	0.0526316	29	100	0.0210526	0.0110957	0.0157895	0.00554786
24	Mutation PTEN	Mutation AXIN2	4	3	8.76325e-10	5.44707e-66	0.00620199	27	100	0.0644737	0.00416089	0.0631579	0.00832178
8	Amplification AURKA	Amplification KRAS	6	2	2.59191e-77	3.00049e-28	0.00526316	25	100	0.0263158	0	0.0263158	0
16	Deletion SMAD4	Deletion PTEN	5	1	1.56841e-86	3.72408e-74	0	24	100	0.0131579	0	0.0131579	0
13	Mutation BRAF	Deletion AXIN2	2	1	2.8435e-21	6.69569e-41	0.0263158	23	100	0.0263158	0	0.0236842	0.00554786
7	Pattern XOR_BRCA2	Amplification IRS2	5	4	6.15942e-09	1.00055e-56	0.000557298	22	100	0.0736842	0.00679471	0.0763158	0.0120913
11	Amplification IGF2	Deletion APC	4	2	6.01068e-31	9.79949e-18	0.103158	21	100	0.0263158	0	0.0302632	0.00635587
23	Mutation TP53	Mutation ATM	60	5	2.05199e-96	4.01115e-109	0	20	100	0.0657895	0	0.0657895	0
15	Mutation PIK3CA	Deletion KRAS	14	1	2.25334e-97	3.35443e-72	0	8	100	0.0131579	0	0.0131579	0
39	Mutation KRAS	Mutation SOX9	37	6	2.43668e-96	3.45122e-86	0.0883948	7	100	0.0789474	0	0.0789474	0
12	Mutation SOX9	Deletion APC	6	2	2.00354e-71	4.49496e-33	0.00526316	4	100	0.0263158	0	0.0263158	0
14	Deletion SMAD2	Deletion DKK4	2	1	3.49627e-21	2.73703e-49	0	4	100	0.025	0.00416089	0.0263158	0
28	Amplification AURKA	Mutation CTNNB1	6	2	5.78951e-77	9.42076e-30	0.00526316	2	100	0.0263158	0	0.0263158	0
37	Pattern XOR_TP53	Mutation SMAD2	61	5	1.98073e-96	9.45271e-109	0	2	100	0.0657895	0	0.0657895	0
27	Mutation SOX9	Mutation BRCA2	6	4	4.50843e-22	1.31636e-14	0.0293381	1	100	0.0578947	0.00920008	0.0526316	0
29	Amplification IGF2	Mutation DKK4	4	1	1.47118e-66	3.79156e-64	0.0526316	0	100	0.0144737	0.00416089	0.0171053	0.0088809
1	NA	Amplification AURKA	#NUM!	#NUM!	#NUM!	#NUM!	#NUM!	#NUM!	#NUM!	0.0789474	0	#NUM!	#NUM!
3	NA	Amplification BRCA2	#NUM!	#NUM!	#NUM!	#NUM!	#NUM!	#NUM!	#NUM!	0.0131579	0	#NUM!	#NUM!
4	NA	Amplification DKK4	#NUM!	#NUM!	#NUM!	#NUM!	#NUM!	#NUM!	#NUM!	0.0263158	0	#NUM!	#NUM!
6	NA	Amplification IGF2	#NUM!	#NUM!	#NUM!	#NUM!	#NUM!	#NUM!	#NUM!	0.0526316	0	#NUM!	#NUM!
21	NA	Mutation APC	#NUM!	#NUM!	#NUM!	#NUM!	#NUM!	#NUM!	#NUM!	0.0921053	0	#NUM!	#NUM!
25	NA	Mutation BRAF	#NUM!	#NUM!	#NUM!	#NUM!	#NUM!	#NUM!	#NUM!	0.0263158	0	#NUM!	#NUM!
30	NA	Mutation ERBB2	#NUM!	#NUM!	#NUM!	#NUM!	#NUM!	#NUM!	#NUM!	0.0657895	0	#NUM!	#NUM!
33	NA	Mutation KRAS	#NUM!	#NUM!	#NUM!	#NUM!	#NUM!	#NUM!	#NUM!	0.581579	0.0391311	#NUM!	#NUM!
34	NA	Mutation NRAS	#NUM!	#NUM!	#NUM!	#NUM!	#NUM!	#NUM!	#NUM!	0.0789474	0	#NUM!	#NUM!
35	NA	Mutation PIK3CA	#NUM!	#NUM!	#NUM!	#NUM!	#NUM!	#NUM!	#NUM!	0.184211	0	#NUM!	#NUM!
36	NA	Mutation PTEN	#NUM!	#NUM!	#NUM!	#NUM!	#NUM!	#NUM!	#NUM!	0.0526316	0	#NUM!	#NUM!
40	NA	Mutation TCF7L2	#NUM!	#NUM!	#NUM!	#NUM!	#NUM!	#NUM!	#NUM!	0.118421	0	#NUM!	#NUM!
41	NA	Mutation TP53	#NUM!	#NUM!	#NUM!	#NUM!	#NUM!	#NUM!	#NUM!	0.210526	0	#NUM!	#NUM!
42	NA	Pattern OR_APC_CTNNB1	#NUM!	#NUM!	#NUM!	#NUM!	#NUM!	#NUM!	#NUM!	0.0789474	0	#NUM!	#NUM!
43	NA	Pattern OR_ERBB2	#NUM!	#NUM!	#NUM!	#NUM!	#NUM!	#NUM!	#NUM!	0.0789474	0	#NUM!	#NUM!
45	NA	Pattern OR_KRAS	#NUM!	#NUM!	#NUM!	#NUM!	#NUM!	#NUM!	#NUM!	0.614474	0.0429959	#NUM!	#NUM!
46	NA	Pattern OR_KRAS_NRAS_BRAF	#NUM!	#NUM!	#NUM!	#NUM!	#NUM!	#NUM!	#NUM!	0.394737	0	#NUM!	#NUM!
47	NA	Pattern OR_SMAD4	#NUM!	#NUM!	#NUM!	#NUM!	#NUM!	#NUM!	#NUM!	0.210526	0	#NUM!	#NUM!
48	NA	Pattern XOR_AXIN2	#NUM!	#NUM!	#NUM!	#NUM!	#NUM!	#NUM!	#NUM!	0.0657895	0	#NUM!	#NUM!
50	NA	Pattern XOR_DKK4	#NUM!	#NUM!	#NUM!	#NUM!	#NUM!	#NUM!	#NUM!	0.0526316	0	#NUM!	#NUM!
52	NA	Pattern XOR_NRAS	#NUM!	#NUM!	#NUM!	#NUM!	#NUM!	#NUM!	#NUM!	0.0921053	0	#NUM!	#NUM!
53	NA	Pattern XOR_PTEN	#NUM!	#NUM!	#NUM!	#NUM!	#NUM!	#NUM!	#NUM!	0.0657895	0	#NUM!	#NUM!
54	NA	Pattern XOR_SMAD2	#NUM!	#NUM!	#NUM!	#NUM!	#NUM!	#NUM!	#NUM!	0.0921053	0	#NUM!	#NUM!
55	NA	Pattern XOR_TP53	#NUM!	#NUM!	#NUM!	#NUM!	#NUM!	#NUM!	#NUM!	0.197368	0	#NUM!	#NUM!
