# Supplementary material for: Comparative proteogenomic analysis of right-sided colon cancer, left-sided colon cancer and rectal cancer reveals distinct mutational profiles
Source: Mol Cancer. 2018 Dec 21;17:177. doi: 10.1186/s12943-018-0923-9 (PMC6303985; doi:10.1186/s12943-018-0923-9)
Supplement: Supplementary file 6 — Table S4. Proteomics pathway and gene level analysis results. (XLSX 47 kb) [file 12943_2018_923_MOESM6_ESM.xlsx]

## Sheet: Pathway Level
Table S4a. Pathway level precision ratios by module numbers for each selected group (P-value <0.05).
	MM	Miller-Madow					The rankings of the association estimators identified by the average performance score (Avg) varied according to the constructed module sizes and the selected groups. In the pathway-level analysis, best performing methods based on the selected groups are as follows: KDE for COAD-left sided colon cancers, MM for COAD-right sided colon cancers and READ-rectal cancers.
	SG	Schurmann-Grassberger
	KDE	Kernel Density Estimator
	BS	B.spline
		COAD LEFT
		7	8	9	Avg
	Adjacency	0.428571	0.375	0.444444	0.416005
	Kendall	0.714286	0.75	0.666667	0.710317
	Pearson	0.857143	0.625	0.777778	0.753307
	Spearman	0.571429	0.625	0.444444	0.546958
	BS	0.857143	0.75	0.666667	0.757937
	Empirical	0.571429	0.5	0.444444	0.505291
	KDE	1	0.875	0.666667	0.847222
	MM	0.857143	0.625	0.555556	0.679233
	SG	0.714286	0.5	0.333333	0.515873
	Shrink	0.714286	0.625	0.444444	0.594577
		COAD RIGHT
		7	8	9	Avg
	Adjacency	0.857143	0.75	0.444444	0.683862
	Kendall	0.857143	0.75	0.555556	0.720899
	Pearson	0.857143	0.625	0.666667	0.71627
	Spearman	0.714286	0.625	0.444444	0.594577
	BS	0.714286	0.625	0.666667	0.668651
	Empirical	0.571429	0.5	0.555556	0.542328
	KDE	0.857143	0.75	0.666667	0.757937
	MM	1	0.625	0.777778	0.800926
	SG	0.428571	0.375	0.333333	0.378968
	Shrink	0.857143	0.625	0.555556	0.679233
		READ RECTUM
		7	8	9	Avg
	Adjacency	0.428571	0.375	0.333333	0.378968
	Kendall	0.714286	0.5	0.444444	0.55291
	Pearson	0.428571	0.25	0.222222	0.300265
	Spearman	0.714286	0.5	0.333333	0.515873
	BS	0.571429	0.625	0.444444	0.546958
	Empirical	0.714286	0.375	0.444444	0.511243
	KDE	0.571429	0.5	0.555556	0.542328
	MM	0.714286	0.5	0.555556	0.589947
	SG	0.571429	0.375	0.555556	0.500661
	Shrink	0.571429	0.5	0.444444	0.505291

## Sheet: Gene Level
Table S4b. Gene level precision ratios by module numbers for each selected group (P-value <0.05).
							The rankings of the association estimators identified by the average performance score (Avg) varied according to the constructed module sizes and the selected groups. In the pathway-level analysis, best performing methods based on the selected groups are as follows: KDE for COAD-left sided colon cancers, MM for COAD-right sided colon cancers and READ-rectal cancers.
	MM	Miller-Madow
	SG	Schurmann-Grassberger
	KDE	Kernel Density Estimator
	BS	B.spline
		COAD LEFT
		7	8	9	Avg
	Adjacency	0.428571	0.375	0.444444	0.416005
	Kendall	0.714286	0.75	0.666667	0.710317
	Pearson	0.857143	0.625	0.777778	0.753307
	Spearman	0.571429	0.625	0.444444	0.546958
	BS	0.857143	0.75	0.666667	0.757937
	Empirical	0.571429	0.5	0.444444	0.505291
	KDE	1	0.875	0.666667	0.847222
	MM	0.857143	0.625	0.555556	0.679233
	SG	0.714286	0.5	0.333333	0.515873
	Shrink	0.714286	0.625	0.444444	0.594577
		COAD RIGHT
		7	8	9	Avg
	Adjacency	0.857143	0.75	0.444444	0.683862
	Kendall	0.857143	0.75	0.555556	0.720899
	Pearson	0.857143	0.625	0.666667	0.71627
	Spearman	0.714286	0.625	0.444444	0.594577
	BS	0.714286	0.625	0.666667	0.668651
	Empirical	0.571429	0.5	0.555556	0.542328
	KDE	0.857143	0.75	0.666667	0.757937
	MM	1	0.625	0.777778	0.800926
	SG	0.428571	0.375	0.333333	0.378968
	Shrink	0.857143	0.625	0.555556	0.679233
		READ RECTUM
		7	8	9	Avg
	Adjacency	0.285714	0.375	0.333333	0.331349
	Kendall	0.714286	0.5	0.333333	0.515873
	Pearson	0.428571	0.25	0.222222	0.300265
	Spearman	0.714286	0.5	0.333333	0.515873
	BS	0.571429	0.625	0.333333	0.509921
	Empirical	0.571429	0.375	0.444444	0.463624
	KDE	0.571429	0.5	0.555556	0.542328
	MM	0.714286	0.5	0.555556	0.589947
	SG	0.571429	0.375	0.555556	0.500661
	Shrink	0.571429	0.5	0.444444	0.505291
